# Supplementary material for: Phosphorylation of bacterial-type phosphoenolpyruvate carboxylase at Ser425 provides a further tier of enzyme control in developing castor oil seeds
Source: PubMed Central journal article supplement — Biochem J. 2010 Dec 15;433(Pt 1):65–74. doi: 10.1042/BJ20101361 (PMC3010082; doi:10.1042/bj20101361), 2010-12-15
Supplement: bj4330065add.pdf [file bj4330065add.pdf]

SUPPLEMENTARY ONLINE DATA

Phosphorylation of bacterial-type phosphoenolpyruvate carboxylase at Ser<sup>425</sup> provides a further tier of enzyme control in developing castor oil seeds

Brendan O'LEARY\*, Srinath K. RAO\* and William C. PLAXTON\*†<sup>1</sup>

\*Department of Biology, Queen's University, Kingston, ON, Canada K7L 3N6, and †Department of Biochemistry, Queen's University, Kingston, ON, Canada K7L 3N6

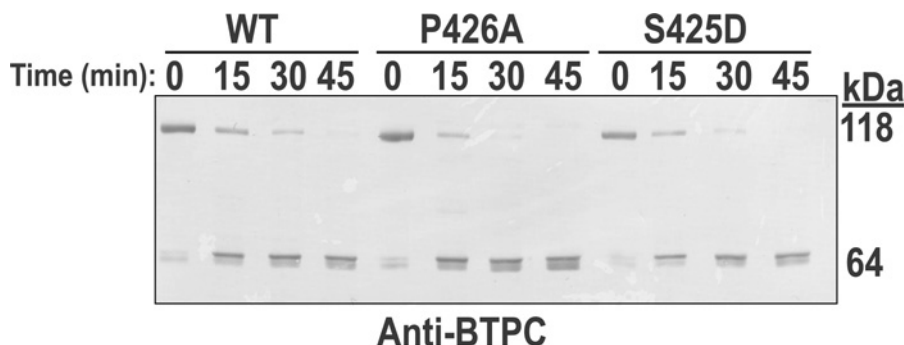

**Figure S1 Sensitivity of recombinant COS BTPC mutants towards endogenous COS proteases**

Purified recombinant Class-2 PEPCs (15 μg) containing wild-type PTPC (AtPPC3) and wild-type and mutant forms of COS BTPC (RcPPC4) were incubated at 30 °C with 50 μl of clarified stage VII COS endosperm extract (containing approx. 1 mg of protein) to observe the rate and extent of BTPC proteolysis. Aliquots were removed at various time points, boiled in SDS sample buffer, and subjected to SDS/PAGE followed by immunoblotting with anti-BTPC antibody. Each lane contained approx. 70 ng of BTPC.

**Table S1 Primers used for site-directed mutagenesis**

The base pair alterations leading to the missense mutation are highlighted in **bold**. Base pair alterations that introduced a new restriction site are underlined.

| Target              | Sequence                                                                                                                                   | New site |
|---------------------|--------------------------------------------------------------------------------------------------------------------------------------------|----------|
| <i>AtPpc3</i> R644A | Forward: 5'-GTGGTGGT <u>ACCG</u> TCGGAGCAGGAGGTGGTCTACTCATC-3'<br>Reverse: 5'-GATGAGTAGGACCCCTCCT <u>GCT</u> CCGAC <u>GGTAC</u> CCACCAC-3' | KpnI     |
| <i>RcPpc4</i> S425D | Forward: 5'-GCTAATTCTAGTGGAGATCCGCGGGCATCTTTC-3'<br>Reverse: 5'-GAAAGATGCCCGCGGATCTCCACTAGAAATTAGC-3'                                      | None     |
| <i>RcPpc4</i> S425A | Forward: 5'-GCTAATTCTTCTGGAGCTCCTCGAGCATC-3'<br>Reverse: 5'-GATGCTCGAGGAGCTCCAGAAGAATTAGC-3'                                               | None     |
| <i>RcPpc4</i> P426A | Forward: 5'-CTAATTCTAGTGGATCTGCGGGGCATCTTTTCAG-3'<br>Reverse: 5'-CTGAAAGATGCCCGCGCAGATCCACTAGAAATTAG-3'                                    | None     |
| <i>RcPpc4</i> R760A | Forward: 5'-CGTGGAGGATCCATTGGTGGTGGTGGCCCCACATA-3'<br>Reverse: 5'-TATGTGGGGCCACCACCAGACCAATGGATCCTCCACG-3'                                 | BamHI    |

<sup>1</sup> To whom correspondence should be addressed (email plaxton@queensu.ca).

**Table S2 Purification of recombinant Class-2 PEPC from combined extracts originating from 5 g of AtPPC3\_R644A- and 10 g of RcPPC4-expressing *E. coli***

| Step                            | Activity (units) | Protein (mg) | Specific activity (units/mg of protein) | Purification (fold) | Yield (%) |
|---------------------------------|------------------|--------------|-----------------------------------------|---------------------|-----------|
| Combined extracts               | 50               | 3000         | 0.016                                   | 1                   | 100       |
| Ni <sup>2+</sup> -affinity FPLC | 43               | 162          | 0.27                                    | 16                  | 86        |
| Superdex-200 FPLC               | 29               | 6.5          | 4.5                                     | 281                 | 58        |
| Superose-6 FPLC                 | 12               | 1.8          | 6.8                                     | 425                 | 24        |

**Table S3 Purification of recombinant Class-2 PEPC from combined extracts originating from 5 g of AtPPC3- and 11 g of RcPPC4\_R670A-expressing *E. coli***

| Step                            | Activity (units) | Protein (mg) | Specific activity (units/mg of protein) | Purification (fold) | Yield (%) |
|---------------------------------|------------------|--------------|-----------------------------------------|---------------------|-----------|
| Combined extracts               | 71               | 2196         | 0.033                                   | 1                   | 100       |
| Ni <sup>2+</sup> -affinity FPLC | 70               | 26.5         | 2.6                                     | 81                  | 98        |
| Superdex-200 FPLC               | 34               | 8.9          | 3.9                                     | 117                 | 49        |
| Superose-6 FPLC                 | 7.6              | 1.6          | 4.8                                     | 145                 | 11        |

**Table S4 Purification of recombinant Class-2 PEPC from combined extracts originating from 5 g of AtPPC3\_R644A- and 15 g of RcPPC4\_S425D-expressing *E. coli***

| Step                            | Activity (units) | Protein (mg) | Specific activity (units/mg of protein) | Purification (fold) | Yield (%) |
|---------------------------------|------------------|--------------|-----------------------------------------|---------------------|-----------|
| Combined extracts               | 172              | 2198         | 0.079                                   | 1                   | 100       |
| Ni <sup>2+</sup> -affinity FPLC | 130              | 80           | 1.6                                     | 20                  | 75        |
| Superdex-200 FPLC               | 52               | 9.6          | 5.5                                     | 70                  | 31        |
| Superose-6 FPLC                 | 40               | 4.2          | 9.5                                     | 120                 | 25        |

**Table S5 Purification of recombinant Class-2 PEPC from combined extracts originating from 5 g of AtPPC3\_R644A- and 15 g of RcPPC4\_S425A-expressing *E. coli***

| Step                            | Activity (units) | Protein (mg) | Specific activity (units/mg of protein) | Purification (fold) | Yield (%) |
|---------------------------------|------------------|--------------|-----------------------------------------|---------------------|-----------|
| Combined extracts               | 37               | 4800         | 0.008                                   | 1                   | 100       |
| Ni <sup>2+</sup> -affinity FPLC | 4.3              | 21.2         | 0.2                                     | 27                  | 12        |
| Superose-6 FPLC*                | 3.7              | 0.8          | 4.6                                     | 575                 | 10        |

\*Owing to low total activity, a Superose-6 16/50 prep grade column was used in place of the two gel filtration columns that were normally used.

**Table S6 Purification of recombinant Class-2 PEPC from combined extracts originating from 5 g of AtPPC3\_R644A- and 15 g of RcPPC4\_P426A-expressing *E. coli***

| Step                            | Activity (units) | Protein (mg) | Specific activity (units/mg of protein) | Purification (fold) | Yield (%) |
|---------------------------------|------------------|--------------|-----------------------------------------|---------------------|-----------|
| Combined extracts               | 114              | 2850         | 0.04                                    | 1                   | 100       |
| Ni <sup>2+</sup> -affinity FPLC | 84               | 88           | 0.95                                    | 24                  | 74        |
| Superdex-200 FPLC               | 38               | 8.1          | 4.7                                     | 118                 | 34        |
| Superose-6 FPLC                 | 11               | 1.4          | 8.4                                     | 210                 | 10        |
